# Supplementary material for: Defining Leadership in Undergraduate Medical Education, Networks, and Instructors: A Scoping Review
Source: MDPI journal article supplement (doi:10.3390/ime2010006), 2023-03-09
Supplement: s1 [file s1]

Archive with 8 entries (8 files):
- Table S1. Operational definitions.pdf
- Table S2. The reasons to select the following databases..pdf
- Table S3. Scoping review s search strategy.pdf
- Table S4. Eligibility criteria for conducting the scoping review.pdf
- Table S5. Handsearching.pdf
- Table S6.  Data Extraction for Studies Included (n= 23).pdf
- Table S7 Actors and Supporters that Have Reported Teaching Leadership in UME and Health Allied Education.pdf
- Table S8. Granular description of leadership by learner..pdf
