# Supplementary material for: Defining Leadership in Undergraduate Medical Education, Networks, and Instructors: A Scoping Review
Source: MDPI journal article supplement (doi:10.3390/ime2010006), 2023-03-09
Supplement: s1 [file s1 › Table S2. The reasons to select the following databases..pdf]

**Table S2.** The reasons to select the following databases.

| Database | Reasons to select                                                                                                                                                                                                                                                                                                                                                                                                                                                                                                                                                    |
|----------|----------------------------------------------------------------------------------------------------------------------------------------------------------------------------------------------------------------------------------------------------------------------------------------------------------------------------------------------------------------------------------------------------------------------------------------------------------------------------------------------------------------------------------------------------------------------|
| Medline  | <ul style="list-style-type: none"><li>• MEDLINE covers areas of health professionals and allied health.</li><li>• 28 million references to journal articles.</li><li>• Records are indexed in Medical Subject Headings (MeSH).</li><li>• One can search by title and abstract.</li><li>• It includes literature in Spanish, Portuguese, and English.</li></ul>                                                                                                                                                                                                       |
| Embase   | <ul style="list-style-type: none"><li>• Embase is a biomedical database.</li><li>• 3,500 international journals</li><li>• Bibliographic records with citations, abstracts and indexing derived from biomedical articles in peer reviewed journals, including public health.</li><li>• Records are indexed in Elsevier Life Science thesaurus Emtree.</li><li>• One can search by title and abstract.</li><li>• Approximately a million records are added yearly. Updated every week.</li><li>• It includes literature in Spanish, Portuguese, and English.</li></ul> |

|                                                                                    |                                                                                                                                                                                                                                                                                                                                                                                                                                                                  |
|------------------------------------------------------------------------------------|------------------------------------------------------------------------------------------------------------------------------------------------------------------------------------------------------------------------------------------------------------------------------------------------------------------------------------------------------------------------------------------------------------------------------------------------------------------|
| Education Resources Information Center(ERIC)                                       | <ul style="list-style-type: none"> <li>• ERIC is an education database.</li> <li>• The database includes records for a variety of source types, including journal articles, books, conference papers, curriculum guides, dissertations and policy papers.</li> <li>• ERIC provides unlimited access to more than 1.6 million bibliographic records and links to nearly 750,000 full-text documents.</li> <li>• Hundreds of new records added monthly.</li> </ul> |
| Biblioteca Virtual en Salud [ Virtual Health Library]                              | <ul style="list-style-type: none"> <li>• It is hosted by Pan American Health Organization/ World Health Organization.</li> <li>• Records are indexed in Descriptores en Ciencias de la Salud (DeCS) and MeSH.</li> <li>• It includes literature in Spanish, Portuguese and English.</li> <li>• Collection of educational resources and distance learning courses registered in the Virtual Campus for Public Health (CVSP) and other platforms.</li> </ul>       |
| Health Information from Latin America and the Caribbean Countries (LILACS): LILACS | <ul style="list-style-type: none"> <li>• LILACS focuses on Health literature in 26 countries.</li> <li>• LILACS includes 915 journals.</li> <li>• LILACS includes systematic reviews, integrative reviews, overviews, technical reports, conferences, thesis and dissertations.</li> <li>• It includes literature in Spanish, Portuguese and English.</li> </ul>                                                                                                 |

---

Google scholar

- It includes articles, theses, books, abstracts, and court opinions, from academic publishers, professional societies, online repositories, universities and other web sites.
  - It includes literature in Spanish, Portuguese, and English.
-
