# Supplementary material for: Defining Leadership in Undergraduate Medical Education, Networks, and Instructors: A Scoping Review
Source: MDPI journal article supplement (doi:10.3390/ime2010006), 2023-03-09
Supplement: s1 [file s1 › Table S3. Scoping review s search strategy.pdf]

**Table S3.** Scoping review's search strategy

Step 1: Search strategy in two databases

The authors used Webb et al's systematic review search strategy [27]. PubMed's strategy considered "Students, Medical [MeSH term] AND leadership [MeSH term] or leadership [all field] AND curriculum". As one could notice the curriculum term did not mention if it was used as a "MeSH", "Title and abstract" or "all field".

Medline via PubMed.

| Date of search                                                                               | March 17th 2021                                                                                                                                             |
|----------------------------------------------------------------------------------------------|-------------------------------------------------------------------------------------------------------------------------------------------------------------|
| Search String                                                                                | ((LEADERSHIP) AND (Students, Medical[MeSH Terms])) AND (Curriculum[MeSH Terms])                                                                             |
| Analysis of the text words and index terms contained in the title and abstract.              | Index terms:<br>-Population: Students, Medical [MeSH terms].<br>-Concept: Leadership [ All field] and Curriculum [MeSH terms].<br>-Context: Not applicable. |
| Mesh words were selected based on the National Center for Biotechnology Information ( NCBI). | Title and abstract: The search strategy did not contain title and abstract domains.                                                                         |
| Hits                                                                                         | 168 results                                                                                                                                                 |

## LILACS ( Search Strategy in Spanish)

|                                                                                 |                                                                                                                                                       |
|---------------------------------------------------------------------------------|-------------------------------------------------------------------------------------------------------------------------------------------------------|
| <b>Date of search</b>                                                           | <b>March 17th 2021</b>                                                                                                                                |
| Search String                                                                   | Estudiantes [Categoria DeCS] and liderazgo [Palabras] and curriculum [Categoria DeCS]                                                                 |
| Analysis of the text words and index terms contained in the title and abstract. | Search Strategy 1<br><br>-Population: Estudiantes (DeCS)<br><br>-Concept: Liderazgo (palabras) and Curriculum (DeCS)<br><br>-Context: Not applicable. |
| Titles and abstracts can be in English, Spanish and/or Portuguese.              |                                                                                                                                                       |
| Hits                                                                            | 0 results                                                                                                                                             |

## Step 2: Search strategy in each database.

Six databases were covered in this scoping review.

1. Medline via PubMed,
2. Embase via Ovid,
3. Education Resources Information Center,
4. Virtual Health Library,
5. Health Information from Latin America and the Caribbean Countries, and
6. Google scholar

### Medline via PubMed.

| Date of search | June 4th 2021.                                                                                                                                                                                                                                                                                  |
|----------------|-------------------------------------------------------------------------------------------------------------------------------------------------------------------------------------------------------------------------------------------------------------------------------------------------|
| Search String  | 1.Students, Medical [Mesh].<br><br>2.Medical student* [ ti/ab].<br><br>3.Health profe* student* [ti,ab].<br><br>4.Public health profe* [ti,ab].<br><br>5.#1 OR # 2 OR # 3 OR # 4 OR #5<br><br>6.Leadership [ Mesh].<br><br>7.Leadership [ti/ab].<br><br>8.#6 OR # 7<br><br>9.Curriculum [ Mesh] |

---

10.Competency-Based Education [ Mesh]

11.Education, Public Health Professional [Mesh]

12.Education, Medical [MeSH]

13.competency framework [ti/ab]

14.competency-based education [ ti/ab].

15.undergraduate medical education [ti/ab]

16.Education, Medical, Undergraduate [MeSH]

17. #9 OR # 10 OR # 11 OR # 12 OR #13 OR #14 OR #15 OR #16

18.Language Spanish

19.Language English

20.Language Portuguese

21.#18 OR #19 OR #20

22.# 5 AND #8 AND # 17 AND # 21 AND Date publication 1/1/1970

to present

(((((Students, Medical[MeSH Terms])) OR (Medical student\*[Title/Abstract])) OR (Health profe\* student\*[Title/Abstract])) OR (Public health profe\*[Title/Abstract])) AND ((Leadership[MeSH Terms]) OR (Leadership[Title/Abstract])) AND (((Curriculum[MeSH Terms]) OR (Competency-Based Education[MeSH Terms])) OR (Education, Public Health Professional[MeSH Terms])) OR (Education, Medical[MeSH Terms])) OR (competency framework[Title/Abstract])) OR (competency-based

---

|                                                                                             |                                                                                                                                                                                                                                                                                                  |
|---------------------------------------------------------------------------------------------|--------------------------------------------------------------------------------------------------------------------------------------------------------------------------------------------------------------------------------------------------------------------------------------------------|
|                                                                                             | education[Title/Abstract])) OR (undergraduate medical education[Title/Abstract])) OR (Education, Medical, Undergraduate[MeSH Terms])) AND (((Spanish[Language]) OR (English[Language])) OR (Portuguese[Language])) AND ("1970/01/01"[Date - Publication] : "3000"[Date - Publication]))          |
| Analysis of the text words and index terms contained in the title and abstract.             | <u>Index terms:</u><br>-Population: Students, Medical [Mesh].<br>-Concept: Leadership [ Mesh].<br>-Context: Curriculum [ Mesh],Competency-Based Education [ Mesh] Education, Public Health Professional [Mesh], Education, Medical [MeSH] and Education, Medical, Undergraduate.                 |
| Mesh words were selected based on the National Center for Biotechnology Information (NCBI). | <u>Title and abstract:</u><br>-Population: Medical student* ( ti/ab), health profe* students ( ti,ab), Public health profe* ( ti,ab).<br>-Concept: leadership ( ti/ab).<br>-Context: competency framework ( ti/ab), competency-based education ( ti/ab), undergraduate medical education [ti/ab] |
| Hits                                                                                        | 912                                                                                                                                                                                                                                                                                              |

---

Embase via Ovid

| Date of search | June 4th 2021.                                                                                                                                                                                                                                                                                                                                                                                                                                                                                                                                                                                                                                                       |
|----------------|----------------------------------------------------------------------------------------------------------------------------------------------------------------------------------------------------------------------------------------------------------------------------------------------------------------------------------------------------------------------------------------------------------------------------------------------------------------------------------------------------------------------------------------------------------------------------------------------------------------------------------------------------------------------|
| Search String  | 1.medical student [Subject Heading]<br><br>2.health student [subject heading]<br><br>3.Medical student* ti<br><br>4.Medical student* ab<br><br>5.health profe* student* ti.<br><br>6.health profe* student* ab.<br><br>7.public health profe* ti<br><br>8.public health profe* ab<br><br>9.#1 OR # 2 OR # 3 OR # 4 OR #5 OR # 6 OR #7 OR # 8<br><br>10.Leadership [Subject Heading].<br><br>11.leadership ti.<br><br>12.leadership ab.<br><br>13.#10 OR # 11 OR # 12<br><br>14.medical education [ Subject Heading]<br><br>15.curriculum[ Subject Heading]<br><br>16.competency-based education ti<br><br>17.competency-based education.ab.<br><br>18.curriculum ti. |

---

19.curriculum ab.

20.undergraduate medical education ti

21.undergraduate medical education ab

22.#14 OR # 15 OR # 16 OR # 17 OR #18 OR # 19 OR #20 OR # 21

23.Spanish.lg

24.English.lg

25.Portuguese .lg

26.# 23 OR # 24 OR # 25

27.#9 AND # 13 AND # 22 AND # 26

(medical student or health student).sh. or Medical student\*.ti. or

Medical student\*.ab. or health profe\* student\*.ti. or health profe\*

student\*.ab. or public health profe\*.ti. or public health profe\*.ab.

leadership.sh. or leadership.ti. or leadership.ab.

(medical education or curriculum).sh. or competency-based

education.ti. or competency-based education.ab. or curriculum.ti. or

curriculum.ab. or undergraduate medical education.ti. or undergraduate

medical education.ab.

(spanish or english or portuguese).lg.

a and b and c and d

---

|                                                                                 |                                                                                                                                                                                                                                                              |
|---------------------------------------------------------------------------------|--------------------------------------------------------------------------------------------------------------------------------------------------------------------------------------------------------------------------------------------------------------|
| Analysis of the text words and index terms contained in the title and abstract. | <u>Index terms:</u><br>-Population: medical student [Subject Heading], health student [subject heading]<br>-Concept: Leadership [Subject Heading].<br>-Context: medical education [ Subject Heading], curriculum[ Subject Heading],                          |
| Emtree (Embase subject headings)                                                | <u>Abstract:</u><br>-Population: Medical student*ti.ab., health profe* student* ti.ab., public health profe* ti.ab.<br>-Concept: leadership ti.ab.<br>-Context: competency-based education ti.ab., curriculum ti.ab., undergraduate medical education ti.ab. |
| Hits                                                                            | 1281                                                                                                                                                                                                                                                         |

| Date of search                                                                  |                                                                                                                                                                                                                                                                                                                                                                                                                                                                                                                                                                                                                                | 6th June 2021                                                                                                               |
|---------------------------------------------------------------------------------|--------------------------------------------------------------------------------------------------------------------------------------------------------------------------------------------------------------------------------------------------------------------------------------------------------------------------------------------------------------------------------------------------------------------------------------------------------------------------------------------------------------------------------------------------------------------------------------------------------------------------------|-----------------------------------------------------------------------------------------------------------------------------|
| Search String                                                                   | <ol style="list-style-type: none"><li>1.KW medical students</li><li>2.TI public health student</li><li>3.AB public health student</li><li>4.TI health student</li><li>5.AB health student</li><li>6. #1 OR #2 OR #3 OR #4 OR #5</li><li>7.TX leadership</li><li>8.TX education</li><li>9.TX training leadership</li><li>10. #8 OR #9</li><li>11. #6 AND #7 AND #10</li></ol> <p>( KW medical students OR TI public health student OR AB public health student OR TI health student OR AB health student ) AND TX leadership AND TX ( education or traning leadership )</p> <p>Limiters - Date Published: 19700101-20211231</p> |                                                                                                                             |
| Analysis of the text words and index terms contained in the title and abstract. | terms:                                                                                                                                                                                                                                                                                                                                                                                                                                                                                                                                                                                                                         | -Population: KW medical students, TI public health student, AB public health student, TI health student , AB health student |

|      |                                                |
|------|------------------------------------------------|
|      | -Concept: TX leadership                        |
|      | -Context: TX education, TX training leadership |
| Hits | 255                                            |

### Virtual Health Library

|                                                                                          |                                                                                                                                               |
|------------------------------------------------------------------------------------------|-----------------------------------------------------------------------------------------------------------------------------------------------|
| <b>Date of search</b>                                                                    | <b>6th June 2021.</b>                                                                                                                         |
| Search String                                                                            | Titulo, resumen y asunto: (estudiante) AND (liderazgo) AND (educación )<br>AND ( la:("en" OR "pt" OR "es")) AND (year_cluster:[1970 TO 2021]) |
| Analysis of the text<br>words and index<br>terms contained in<br>the title and abstract. | Search Strategy 1<br><br>-Population: estudiante<br><br>-Concept: liderazgo<br><br>-Context: Educación                                        |
| Hits                                                                                     | 470                                                                                                                                           |

## LILACS ( Search Strategy in Spanish)

|                                                      |                                                                                                                                                                                      |
|------------------------------------------------------|--------------------------------------------------------------------------------------------------------------------------------------------------------------------------------------|
| <b>Date of search</b>                                | <b>6th June 2021</b>                                                                                                                                                                 |
| Search String                                        | Estudiante[ palabra] AND liderazgo [ palabra] AND educación [ palabra]                                                                                                               |
| Analysis of the words                                | <p>Search Strategy 1</p> <p>-Population: estudiantes (palabras)</p> <p>-Concept: Liderazgo (palabras).</p> <p>-Context: Educación(palabras)</p>                                      |
| Hits 1 ( too narrow the search strategy) ( excluded) | 74                                                                                                                                                                                   |
| Date of Search                                       | June 9th 2021                                                                                                                                                                        |
| Search String                                        | Liderazgo [palabra] and educación or educación basada en competencias. [palabra]                                                                                                     |
| Analysis of the words                                | <p>Search Strategy 1</p> <p>-Population: No included</p> <p>-Concept: Liderazgo (palabras).</p> <p>-Context: Educación(palabras) or educación basada en competencias (palabras).</p> |

---

|                       |     |
|-----------------------|-----|
| Hits 2 final search ( | 440 |
| included )            |     |

---

LILACS ( Search Strategy in Portuguese )

| Date of search         | 6th June 2021.                                                         |
|------------------------|------------------------------------------------------------------------|
| Search String          | estudantes [ palavra] AND Liderança [ palavra] AND Educação [ palavra] |
| Analysis of the text   | Search Strategy 1                                                      |
| words.                 | -Population: estudantes (palavras)                                     |
|                        | -Concept: Liderança (palavras).                                        |
|                        | -Context: Educação (palavras)                                          |
| Hits 1 too narrow the  | 66                                                                     |
| search strategy (      |                                                                        |
| excluded)              |                                                                        |
| Date of search         | 9th June 2021                                                          |
|                        | -Population: No aplicable                                              |
|                        | -Concept: Liderança (palavras).                                        |
|                        | -Context: Educação (palavras) or Educação baseada em competencias      |
| Hits 2: final search ( | 421                                                                    |
| included)              |                                                                        |

---

## Google Scholar

| <hr/>                |                                                                 |
|----------------------|-----------------------------------------------------------------|
| Date of search       | 11th June 2021                                                  |
| <hr/>                |                                                                 |
| Search String 1      | Find articles                                                   |
|                      | with all of the words: health students                          |
|                      | with the exact phrase: leadership                               |
|                      | with at least one of the words: education, curriculum, training |
|                      | without the words: Not applicable                               |
|                      | where my words occur:                                           |
|                      | Return articles dated between: 1970-2021                        |
|                      | Search English, Portuguese, Spanish                             |
| <hr/>                |                                                                 |
| Analysis of the text | -Population: health students                                    |
| words.               | -Concept: leadership                                            |
|                      | -Context: education, curriculum, training                       |
| <hr/>                |                                                                 |
| Hits 1 ( included)   | 11                                                              |
| <hr/>                |                                                                 |
| Search String 2      | Find articles                                                   |
|                      | with all of the words: health professions                       |
|                      | with the exact phrase: leadership                               |
|                      | with at least one of the words: education, curriculum, training |
|                      | without the words: Not applicable                               |
|                      | where my words occur:                                           |
| <hr/>                |                                                                 |

|                            |                                                                                                                                                                                                                                                                                                                                             |
|----------------------------|---------------------------------------------------------------------------------------------------------------------------------------------------------------------------------------------------------------------------------------------------------------------------------------------------------------------------------------------|
|                            | Return articles dated between: 1970-2021                                                                                                                                                                                                                                                                                                    |
|                            | Search English, Portuguese, Spanish                                                                                                                                                                                                                                                                                                         |
| Analysis of the text words | -Population: health students<br>-Concept: leadership<br>-Context: education, curriculum, training                                                                                                                                                                                                                                           |
| Hits 2 ( included)         | 20                                                                                                                                                                                                                                                                                                                                          |
| Search String 3            | Find articles<br><br>with all of the words: public health<br><br>with the exact phrase: leadership<br><br>with at least one of the words: education, curriculum, training<br><br>without the words: Not applicable<br><br>where my words occur:<br><br>Return articles dated between: 1970-2021<br><br>Search English, Portuguese, Spanish. |
| Analysis of the text words | -Population: public health<br>-Concept: leadership<br>-Context: education, curriculum, training.                                                                                                                                                                                                                                            |
| Hits 3 ( included)         | 95                                                                                                                                                                                                                                                                                                                                          |

Total hits and last search 11th June 2021.

|                                                                        |
|------------------------------------------------------------------------|
| Total hits: $912 + 1281 + 255 + 470 + 440 + 421 + 11 + 20 + 95 = 3905$ |
|------------------------------------------------------------------------|
