# Supplementary material for: Defining Leadership in Undergraduate Medical Education, Networks, and Instructors: A Scoping Review
Source: MDPI journal article supplement (doi:10.3390/ime2010006), 2023-03-09
Supplement: s1 [file s1 › Table S4. Eligibility criteria for conducting the scoping review.pdf]

**Table S4.** Eligibility criteria for conducting the scoping review

| <b>PCC</b> | <b>Inclusion criteria</b>                                                                                                                                                                                                                                                                                                                                                                                                                                             | <b>Exclusion criteria.</b>                                                                                                                                                                                                                                                                                                                                                       |
|------------|-----------------------------------------------------------------------------------------------------------------------------------------------------------------------------------------------------------------------------------------------------------------------------------------------------------------------------------------------------------------------------------------------------------------------------------------------------------------------|----------------------------------------------------------------------------------------------------------------------------------------------------------------------------------------------------------------------------------------------------------------------------------------------------------------------------------------------------------------------------------|
| Population | <p>Literature that concentrates on UME.</p> <p>Literature that concentrates on UME + IPE/TPE.</p>                                                                                                                                                                                                                                                                                                                                                                     | <p>Literature that is focused on:</p> <p>Postgraduate Medical Education</p> <p>Health workforce education that excludes UME, and</p> <p>Public Health Workforce education that excludes UME.</p>                                                                                                                                                                                 |
| Concept    | <p>Literature that covers how to establish, implement, and/or assess leadership frameworks in UME via Competency-Based Education and</p> <p>Frameworks focus on leadership as the main topic, frameworks that include leadership as a domain, leadership as a competency, or leadership as a learning objective.</p> <p>Literature covers Undergraduate Medical Students' aspirations, perceptions, or motivations to create, implement or assess a leadership as</p> | <p>Literature that fulfils at least one exclusion criterium:</p> <p>Literature that does not focus on leadership ( e.g. management );</p> <p>Frameworks that do not mention leadership as the main topic;</p> <p>Frameworks that do not cover leadership as a domain; and</p> <p>Literature does not cover how to create, implement, or assess leadership frameworks in UME.</p> |

|                            |                                                                                                                                                                                                                                                                                                                                                                                                                                                                                                                                                                                                                     |                                                                                                                                                    |
|----------------------------|---------------------------------------------------------------------------------------------------------------------------------------------------------------------------------------------------------------------------------------------------------------------------------------------------------------------------------------------------------------------------------------------------------------------------------------------------------------------------------------------------------------------------------------------------------------------------------------------------------------------|----------------------------------------------------------------------------------------------------------------------------------------------------|
|                            | framework, domains, competencies or learning objectives.                                                                                                                                                                                                                                                                                                                                                                                                                                                                                                                                                            |                                                                                                                                                    |
| Context:                   | Universities have used a framework.                                                                                                                                                                                                                                                                                                                                                                                                                                                                                                                                                                                 | the leadership frameworks are not used in a university.                                                                                            |
| Types of evidence sources: | Published and grey literature;<br>Languages: Spanish, Portuguese, and English;<br>Time frame1970 to 2021. Competency construct starts in the 1970s and 1980s.<br><br>References to support time limits.<br><br>Carraccio, C., Wolfsthal, S. D., Englander, R., Ferentz, K., & Martin, C. (2002). Shifting paradigms: from flexner to competencies. <i>Academic Medicine</i> , 77(5), 361–67.<br><br>Frank, J. R., Mungroo, R., Ahmad, Y., Wang, M., De Rossi, S., & Horsley, T. (2010). Toward a definition of competency-based education in medicine: a systematic review of published definitions. <i>Medical</i> | Languages that are not mentioned in the inclusion criteria and<br><br>The publication is out of the time frame.<br><br>Full text is not available. |

---

*Teacher*, 32(8), 631–7.

<https://doi.org/10.3109/0142159X.201>

0.500898

Vasquez, J.A., Marcotte, K., Gruppen, L.D.,. (2021). The parallel evolution of competency-based education in medical and higher education.

*Competency- based*

*Education*,6:e01234.

<https://doi.org/10.1002/cbe2.1234>

---

|                     |                                                                                                                                                                                               |                                                                                                                                      |
|---------------------|-----------------------------------------------------------------------------------------------------------------------------------------------------------------------------------------------|--------------------------------------------------------------------------------------------------------------------------------------|
| Quality assessment: | Quantitative: rate "strong" or "moderate".<br><br>Qualitative: rate "yes" or "I cannot tell".<br><br>Grey literature: "yes" , "?" or "no".<br><br>Mix methods :rate "yes" or "I cannot tell". | Quantitative: rate sections with "weak".<br><br>Qualitative: rate "no".<br><br>Grey literature: "no".<br><br>Mix methods: rate "no". |
|---------------------|-----------------------------------------------------------------------------------------------------------------------------------------------------------------------------------------------|--------------------------------------------------------------------------------------------------------------------------------------|

---

Note. The next tools were used to assess the quality of each document: i) The Effective Public Health Practice Project (EPHPP) toolkits, which included the Quality Assessment Tool for Quantitative Studies; ii) The Critical Appraisal Skills Programme (CASP) Qualitative Research Checklist; iii)The Authority, Accuracy, Coverage, Objectivity, Date, Significance checklist for grey literature; and iv) The Mixed Methods Appraisal Tool Version 2018.
