# Supplementary material for: Defining Leadership in Undergraduate Medical Education, Networks, and Instructors: A Scoping Review
Source: MDPI journal article supplement (doi:10.3390/ime2010006), 2023-03-09
Supplement: s1 [file s1 › Table S7 Actors and Supporters that Have Reported Teaching Leadership in UME and Health Allied Education.pdf]

**Table S7.** Actors and supporters that have reported teaching leadership in UME, IPE and TPE

| #  | Country               | Actor                                                              | Category                          |
|----|-----------------------|--------------------------------------------------------------------|-----------------------------------|
| 1  | Albania               | University of Medicine                                             | Universities- Healthcare services |
| 2  | Austria               | Medical University of Graz                                         | Universities- Healthcare services |
| 3  | Australia             | James Cook University                                              | Universities- Healthcare services |
| 4  | Australia             | Griffith university                                                | Universities- Healthcare services |
| 5  | Headquarters: Belgium | The Association of Schools of Public Health in the European Region | Other                             |
| 6  | Canada                | University of Ottawa                                               | Universities- Healthcare services |
| 7  | Canada                | University of Toronto                                              | Universities- Healthcare services |
| 8  | Canada                | Bruyère Research Institute                                         | Other                             |
| 9  | Canada                | Institut du Savoir Montfort                                        | Other                             |
| 10 | Canada                | University of Manitoba                                             | Universities- Healthcare services |
| 11 | Canada                | University of Sherbrooke                                           | Universities- Healthcare services |
| 12 | Canada                | Inner City Health Associates                                       | Other                             |
| 13 | Canada                | Schulich School of Medicine- Western University.                   | Universities- Healthcare services |
| 14 | Canada                | McMaster University                                                | Universities- Healthcare services |

|    |                                    |                                                         |                                   |
|----|------------------------------------|---------------------------------------------------------|-----------------------------------|
| 15 | Canada                             | Canadian Alliance to End Homelessness                   | Other                             |
| 16 | Germany                            | Ludwig-Maximilians-Universität                          | Universities- Healthcare services |
| 17 | Germany                            | Klinikum der LMU München                                | Universities- Healthcare services |
| 18 | Lithuania                          | Lithuanian University of Health Sciences                | Universities- Healthcare services |
| 19 | Poland                             | Jagiellonian University Medical College                 | Universities- Healthcare services |
| 20 | Republic of Korea<br>(South Korea) | Hallym University College of Medicine                   | Universities- Healthcare services |
| 21 | Republic of Korea<br>(South Korea) | Korea Institute for Research in the Behavioral Sciences | Other                             |
| 22 | Saudi Arabia                       | King Abdulaziz University                               | Universities- Healthcare services |
| 23 | Serbia                             | University of Belgrade                                  | Universities- Healthcare services |
| 24 | The Netherlands                    | Maastricht University                                   | Universities- Healthcare services |
| 25 | UK                                 | Open University                                         | Universities- Healthcare services |
| 26 | UK                                 | Canterbury Christ Church University                     | Universities- Healthcare services |
| 27 | UK                                 | GRL Consulting in Higher and Medical Education.         | Other                             |
| 28 | UK                                 | Sheffield Hallam University                             | Universities- Healthcare services |
| 29 | UK                                 | Epsom and St. Helier University Hospitals NHS Trust     | Universities- Healthcare services |

|    |    |                                                       |                                   |
|----|----|-------------------------------------------------------|-----------------------------------|
| 30 | UK | Lewisham and Greenwich NHS Trust                      | Universities- Healthcare services |
| 31 | UK | The Institute of Clinical Leadership                  | Other                             |
| 32 | UK | Sepulveda VA Ambulatory Care Center                   | Universities- Healthcare services |
| 33 | UK | Queen Edith Medical Practice                          | Universities- Healthcare services |
| 34 | UK | Imperial College Healthcare NHS Trust                 | Universities- Healthcare services |
| 35 | UK | West Suffolk Hospital NHS Trust                       | Universities- Healthcare services |
| 36 | UK | Hinchingbrooke Health Care NHS Trust                  | Universities- Healthcare services |
| 37 | UK | Barts and The London School of Medicine and Dentistry | Universities- Healthcare services |
| 38 | UK | King's College London                                 | Universities- Healthcare services |
| 39 | UK | University of Birmingham                              | Universities- Healthcare services |
| 40 | UK | Faculty of Medical Leadership and Management          | Other                             |
| 41 | UK | St George's Medical School                            | Universities- Healthcare services |
| 42 | UK | Warwick Medical School                                | Universities- Healthcare services |
| 43 | UK | University of Southampton                             | Universities- Healthcare services |
| 44 | UK | University of Leicester                               | Universities- Healthcare services |
| 45 | UK | Newcastle University                                  | Universities- Healthcare services |
| 46 | UK | Peninsula College of Medicine and Dentistry           | Universities- Healthcare services |

|    |         |                                                      |                                   |
|----|---------|------------------------------------------------------|-----------------------------------|
| 47 | UK      | University of Manchester                             | Universities- Healthcare services |
| 48 | UK      | University of Cambridge                              | Universities- Healthcare services |
| 49 | UK      | University of Nottingham Medical School              | Universities- Healthcare services |
| 50 | UK      | University College London.                           | Universities- Healthcare services |
| 51 | UK      | Swansea University.                                  | Universities- Healthcare services |
| 52 | UK      | University of Liverpool.                             | Universities- Healthcare services |
| 53 | UK      | Keele University.                                    | Universities- Healthcare services |
| 54 | UK      | Brighton and Sussex Medical School.                  | Universities- Healthcare services |
| 55 | UK      | University of Edinburgh.                             | Universities- Healthcare services |
| 56 | UK      | University of Oxford Medical School.                 | Universities- Healthcare services |
| 57 | UK      | The University of Sheffield.                         | Universities- Healthcare services |
| 58 | UK      | Imperial College London.                             | Universities- Healthcare services |
| 59 | UK      | Cambridge University Hospitals NHS Foundation Trust  | Universities- Healthcare services |
| 60 | Ukraine | Bukovinian State Medical University                  | Universities- Healthcare services |
| 61 | USA     | University of Michigan Medical School                | Universities- Healthcare services |
| 62 | USA     | University of Illinois                               | Universities- Healthcare services |
| 63 | USA     | Uniformed Services University of the Health Sciences | Universities- Healthcare services |

|    |     |                                                                       |                                   |
|----|-----|-----------------------------------------------------------------------|-----------------------------------|
| 64 | USA | University of Massachusetts Medical School                            | Universities- Healthcare services |
| 65 | USA | Duke University School of Medicine                                    | Universities- Healthcare services |
| 66 | USA | Rocky Vista University College of Osteopathic Medicine                | Universities- Healthcare services |
| 67 | USA | Rutgers New Jersey Medical School                                     | Universities- Healthcare services |
| 68 | USA | Bureau of Health Workforce, Health Resources Services Administration  | Other                             |
| 69 | USA | Florida International University Herbert Wertheim College of Medicine | Universities- Healthcare services |
| 70 | USA | Penn State College of Medicine                                        | Universities- Healthcare services |
| 71 | USA | American Medical Association                                          | Other                             |
| 72 | USA | Mayo Medical School, Mayo Clinic College of Medicine                  | Universities- Healthcare services |
| 73 | USA | Alpert Medical School of Brown University.                            | Universities- Healthcare services |
| 74 | USA | Oregon Health & Science University School of Medicine                 | Universities- Healthcare services |
| 75 | USA | University of California                                              | Universities- Healthcare services |
| 76 | USA | Vanderbilt University School of Medicine                              | Universities- Healthcare services |
| 77 | USA | Indiana University School of Medicine                                 | Universities- Healthcare services |
| 78 | USA | Brody School of Medicine at East Carolina University                  | Universities- Healthcare services |
| 79 | USA | New York University School of Medicine                                | Universities- Healthcare services |
| 80 | USA | Baylor College of Medicine                                            | Universities- Healthcare services |

|          |                                     |                                                                    |                                   |
|----------|-------------------------------------|--------------------------------------------------------------------|-----------------------------------|
| 81       | USA                                 | George Washington University School of Medicine                    | Universities- Healthcare services |
| 82       | USA                                 | Johns Hopkins Hospital                                             | Universities- Healthcare services |
| 83       | USA                                 | University of British Columbia                                     | Universities- Healthcare services |
| 84       | USA                                 | Stanford University                                                | Universities- Healthcare services |
| 85       | USA                                 | The Rethmeier Group, LLC.                                          | Other                             |
| 86       | USA                                 | University of North Carolina                                       | Universities- Healthcare services |
| <b>#</b> | <b>Country</b>                      | <b>Supporters</b>                                                  | <b>Category</b>                   |
| 1        | Headquarters: Belgium               | The European Commission                                            | Other                             |
| 2        | Canada                              | Inner City Health Associates                                       | Other                             |
| 3        | Canada                              | Canadian Medical Association                                       | Other                             |
| 4        | Canada                              | Public Health Association of Canada                                | Other                             |
| 5        | Canada                              | Canadian Federation of Medical Students                            | Other                             |
| 6        | Germany                             | University hospital of LMU Munich (Ludwig-Maximilians-Universität) | Universities- Healthcare services |
| 7        | Germany                             | the German Society of Medical Education                            | Other                             |
| 8        | Republic of Korea<br>( South Korea) | Ministry of Education of the Republic of Korea                     | Other                             |
| 9        | Republic of Korea                   | National Research Foundation of Korea                              | Other                             |

|    |                 |                                                                                   |                                   |
|----|-----------------|-----------------------------------------------------------------------------------|-----------------------------------|
|    | (South Korea)   |                                                                                   |                                   |
| 10 | The Netherlands | Maastricht University                                                             | Universities- Healthcare services |
| 11 | UK              | Faculty of Medical Leadership and Management                                      | Other                             |
| 12 | USA             | American Medical Association                                                      | Other                             |
| 13 | USA             | Alpha Omega Alpha Honor Medical Society                                           | Other                             |
| 14 | USA             | Henry M. Jackson Foundation                                                       | Other                             |
| 15 | USA             | University of Michigan Medical School                                             | Universities- Healthcare services |
| 16 | USA             | University of California                                                          | Universities- Healthcare services |
| 17 | UK              | Faculty of Medical Leadership and Management                                      | Other                             |
| 18 | USA             | the Association of American Medical Colleges Western Group on Educational Affairs | Other                             |
| 19 | USA             | The University of Michigan                                                        | Universities- Healthcare services |
