# Supplementary material for: Defining Leadership in Undergraduate Medical Education, Networks, and Instructors: A Scoping Review
Source: MDPI journal article supplement (doi:10.3390/ime2010006), 2023-03-09
Supplement: s1 [file s1 › Table S8. Granular description of leadership by learner..pdf]

**Table S8.**Granular description of leadership and leader by learner

| Leader & leadership | Learner           | Key functions.                                                                                                                                                                                                                                                                                                                                                                                                          |
|---------------------|-------------------|-------------------------------------------------------------------------------------------------------------------------------------------------------------------------------------------------------------------------------------------------------------------------------------------------------------------------------------------------------------------------------------------------------------------------|
| Leader              | UME               | <ul style="list-style-type: none"> <li>• To engage with others.</li> <li>• To contribute to a vision.</li> <li>• To take responsibility.</li> <li>• Activities as clinicians, administrators, scholars, or teachers.</li> </ul>                                                                                                                                                                                         |
|                     | MEDICAL EDUCATION | <ul style="list-style-type: none"> <li>• To have a vision.</li> <li>• To Inspire people to move on.</li> <li>• To Inspire to do the job well.</li> <li>• To Inspire to have a good practice.</li> <li>• To Inspire to become the best they can be as a group working together toward a common goal.</li> <li>• To show other travellers the path ahead.</li> <li>• To embrace change as a means to innovate.</li> </ul> |

- 
- To apply leadership skills to all aspect of health care, from education to delivery of care.

---

INTERPROFESSIONAL

- To develop humble, reflective leaders.
  - To identify problems.
  - To work collaboratively with teams to create solutions.
  - To create a vision for positive change.
  - To set the vision.
  - To inspire followers.
  - To drive of these processes (refers to social psychological processes, interpersonal and group dynamics, and influence on all aspects of psychology (behaviors, cognitions, and motivations) of others).
  - To adjust to goals.
  - To adjust individuals.
  - To adjust context.
-

|            | TRANSPROFESSIONAL. | NONE                                                                                                                                                                                                                                                                                                                                       |
|------------|--------------------|--------------------------------------------------------------------------------------------------------------------------------------------------------------------------------------------------------------------------------------------------------------------------------------------------------------------------------------------|
| Leadership | UME                | <ul style="list-style-type: none"> <li>• To inspire others to work together.</li> <li>• To achieve a common vision.</li> <li>• To exert conscious, goal-oriented social influence on people (subordinates, colleagues and teams)</li> <li>• To perform shared tasks in pursuit of common goals.</li> <li>• To focus on leading.</li> </ul> |
|            | MEDICAL EDUCATION  | <ul style="list-style-type: none"> <li>• To have the insight.</li> <li>• How a person can contribute to an institutional or country vision.</li> <li>• Time management.</li> <li>• To direct the activities of a group toward a shared goal.</li> <li>• To produces change and movement.</li> </ul>                                        |

---

INTERPROFESSIONAL

- To influence on individuals and groups by enhancing behaviors (actions).
- To influence on individuals and groups by cognitions (perceptions, thoughts, and beliefs).
- To influence on individuals and groups by motivations (why people act and think as they do).
- To achieve goals that benefit the individuals and groups.
- To social psychological processes, interpersonal and group dynamics.
- To influence on all aspects of psychology (behaviors, cognitions, and motivations) of others.

---

TRANSPROFESSIONAL.

- To influence others
  - To work together towards achieving a common goal.
  - Transformation and change.
-

|                            |     |                                                                                                                                                                                                                                                                                                                                                                                                                                                |
|----------------------------|-----|------------------------------------------------------------------------------------------------------------------------------------------------------------------------------------------------------------------------------------------------------------------------------------------------------------------------------------------------------------------------------------------------------------------------------------------------|
|                            |     | <ul style="list-style-type: none"> <li>• System thinking.</li> <li>• Emotional intelligence.</li> <li>• Collaboration and teamwork.</li> <li>• Organisational learning and development.</li> <li>• Leading change.</li> <li>• Ethical and professional practice.</li> </ul>                                                                                                                                                                    |
| Leadership in combination. | UME | <ol style="list-style-type: none"> <li>1. Lateral leadership <ul style="list-style-type: none"> <li>• To exert influence without formal power and disciplinary leadership functions.</li> </ul> </li> <li>2. Ethical leadership <ul style="list-style-type: none"> <li>• To emphasize the responsibility of leaders for human dignity.</li> <li>• To emphasize the responsibility of leaders for excellent performance.</li> </ul> </li> </ol> |

---

### 3. Leadership and Change

- To inspire motivation in others.
- To create goals toward a desirable vision
- Leadership pertains to team-based care and quality improvement projects.

### 4. Professionalism and Ethics

- Ethical behavior and professionalism, including conduct
- Congruent with generally accepted moral principles and values and with professional guidelines based on those principles and values.
- General leadership ethics: honesty and responsibility.

### 5. Shared Leadership

---

- 
- Being a responsibility for all staff at every level through effective teamwork
  - Being a responsibility for the continuous development of personal MLM attributes and behaviours

6. Leadership and Resilience Stems

- Intrapersonal relationship one has with oneself.
- Interpersonal relationships
- Relationships within organizations. To build partnership, respect, and change capacity.

---

MEDICAL EDUCATION

1. Patience and Leadership:

- To reflect on, examine, and endure in difficult situations.
  - To view health care in its social context
-

- 
- To reach agreement with other members of an organization

2. Educational Leadership

- Academic positions (formal administrative responsibilities for educational program)

---

INTERPROFESSIONAL

NONE

---

TRANSPROFESSIONAL.

NONE

---
